# Supplementary material for: Amyloid peptide hydrogels via formation of coordination polymers with Ag+ by its core peptide equipped with a C-cysteine
Source: Royal Society of Chemistry journal article supplement (doi:10.1039/d3cc02076b), 2023-01-01
Supplement: d3cc02076b1.pdf [file d3cc02076b1.pdf]

## Electronic Supplementary Information (ESI)

### **Amyloid peptide hydrogels via formation of coordination polymers with Ag<sup>+</sup> by its core peptide equipped with a C-cysteine**

Qian Wang,\* Fu-Peng Zhou, Dan-Dan Tao, Jin-Hong Wei, Rui Cai and Yun-Bao Jiang\*

Department of Chemistry, College of Chemistry and Chemical Engineering, the MOE Key  
Laboratory of Spectrochemical Analysis and Instrumentation, and *iChEM*, Xiamen University,  
Xiamen 361005, China

E-mail: [wqchem@xmu.edu.cn](mailto:wqchem@xmu.edu.cn), [ybjjiang@xmu.edu.cn](mailto:ybjjiang@xmu.edu.cn)

|                                  |          |
|----------------------------------|----------|
| <b>1. Materials.....</b>         | <b>2</b> |
| <b>2. General Methods.....</b>   | <b>2</b> |
| <b>3. References.....</b>        | <b>3</b> |
| <b>4. Experimental Data.....</b> | <b>4</b> |

## 1. Materials

**KLVFFC** peptides (L-/D-**KLVFFC**, >98%) and A $\beta$  (1-40) peptide (>95%) were custom synthesized by GL Biochem. Silver nitrate (AgNO<sub>3</sub>,  $\geq$ 99.8%) and hydrogen nitrate (HNO<sub>3</sub>, 65%~68%) were purchased from Sinopharm Chemical Reagent Ltd. Hexafluoro-2-propanol (HFIP) was purchased from Meryer co. Ltd. Thioflavin T (ThT) was purchased from Energy Chemical Reagent Ltd. All reagents of analytical grade were used without further purification.

## 2. Methods

### A $\beta$ (1-40) sample preparation

A $\beta$  (1-40) peptide was disaggregated and prepared according to a classic protocol as previously described.<sup>1</sup> Briefly, 1 mL HFIP was added into 1 mg A $\beta$  peptide followed by sonication to disaggregate the peptide into monomer form. HFIP was then removed by a slow stream of dry N<sub>2</sub> gas. The procedure was repeated three times and a colorless transparent peptide film was observed on the wall of Eppendorf Protein LoBind tubes. The peptide film was then dried under fume hood overnight and stored at -20 °C.

### Thioflavin T aggregation assay

A $\beta$  (1-40) monomer film was suspended in DMSO to a concentration of 2.5 mM, followed by vortex sonication, before diluted with PBS buffer (pH 7.5) to a final concentration of 50  $\mu$ M. Stock ThT solution was prepared by dissolving ThT powder to 5 mg/mL in water. Prior the fluorescence measurement, the ThT solution was diluted to 25  $\mu$ M with PBS buffer and added to A $\beta$  (1-40) peptide aggregates at different incubation time.<sup>2</sup>  $\lambda_{\text{ex}} = 430$  nm, the excitation and emission slit width were set at 5 nm and 10 nm, respectively

### TEM and SEM imaging

TEM images were obtained by JEM-1400 transmission electron microscope. For sample preparation, drop-casting of 10  $\mu$ L **KC** or Ag<sup>+</sup>-**KC** coordination polymers were applied to carbon film supported copper grid of 400 mesh. The grids were air-dried and applied for TEM imaging. SEM imaging was conducted on Hitachi S-4800 scanning electron microscope. Lyophilized hydrogels at 2 wt% were applied to conductive tape for SEM observation.

### Cell Culture and Cytotoxicity

HeLa cells were incubated in DMEM medium with 10% FBS and 1% antibiotic (penicillin–

streptomycin, 10 000 U mL<sup>-1</sup>) in a humidified atmosphere with 5% CO<sub>2</sub> at 37 °C. The cytotoxicity of Ag<sup>+</sup>-L-KC against HeLa cells at pH 7.4 was studied by CCK-8 assay. Cells were seeded on 96-well plates with a density of 10000 cells per well. The medium was removed and various concentrations of Ag<sup>+</sup>-L-KC in DMEM with 10% FBS at pH 7.4 were added. The cells were incubated for 48 h before CCK-8 was added. The optical density (OD) at 450 nm was determined via a microplate reader. The relative cell viability was defined by: cell viability (%) = OD<sub>(sample)</sub> / OD<sub>(control)</sub> × 100%. For control experiment, the OD value in the absence of Ag<sup>+</sup>-L-KC was measured in a similar way.

Absorption spectra were recorded on a Thermo Evolution 300 spectrophotometer. CD spectra were conducted using JASCO J-1500 Circular Dichroism Spectrometer. Fluorescence spectra were recorded using Horiba Fluoromax-4 spectrofluorometer. FT-IR spectra were recorded using Thermofisher Nicolet iS50 FT-IR spectrometer. XRD measurements were obtained using Rigaku Smartlab-SE X-ray diffractometer. Rheometric measurements were obtained using DHR-2 rotary rheometer. <sup>1</sup>H NMR spectra were recorded on a Bruker Avance III HD 850 MHz NMR Spectrometer using tetramethylsilane as an internal standard. MALDI-TOF MS spectra were acquired on a Bruker autoflex maX MALDI-TOF Mass Spectrometer.

### 3. References

- 1 W. B. Stine, K. N. Dahlgren, G. A. Krafft and M. J. LaDu, *J. Biol. Chem.*, 2003, **278**, 11612-11622.
- 2 D. Shea, C.-C. Hsu, T. M. Bi, N. Paranjapye, M. C. Childers, J. Cochran, C. P. Tomberlin, L. Wang, D. Paris, J. Zonderman, G. Varani, C. D. Link, M. Mullan and V. Daggett, *Proc. Nat. Acad. Sci. U.S.A.*, 2019, **116**, 8895-8900.

## 4. Experimental Data

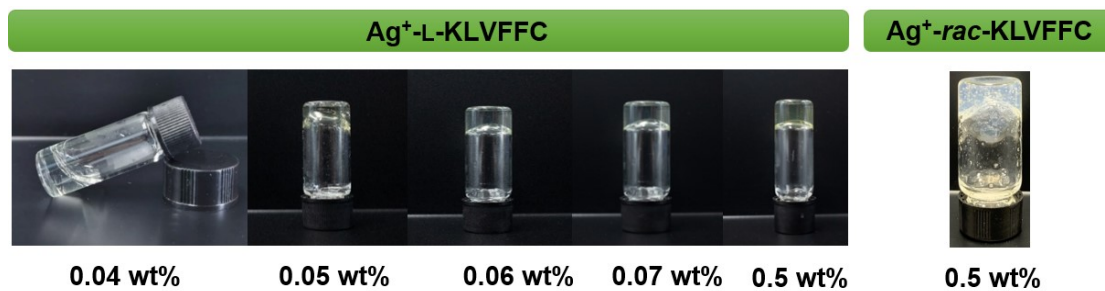

**Fig. S1** Photographs of Ag<sup>+</sup>-L-KLVFFC hydrogels at 0.04 wt% - 0.5 wt% and Ag<sup>+</sup>-rac-KLVFFC hydrogels at 0.5 wt%.

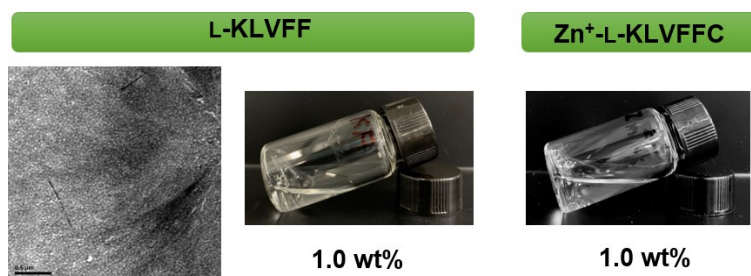

**Fig. S2** Left to right are TEM image, photograph of self-assembled L-KLVFF peptide and Zn<sup>+</sup>-L-KLVFFC at 1.0 wt%.

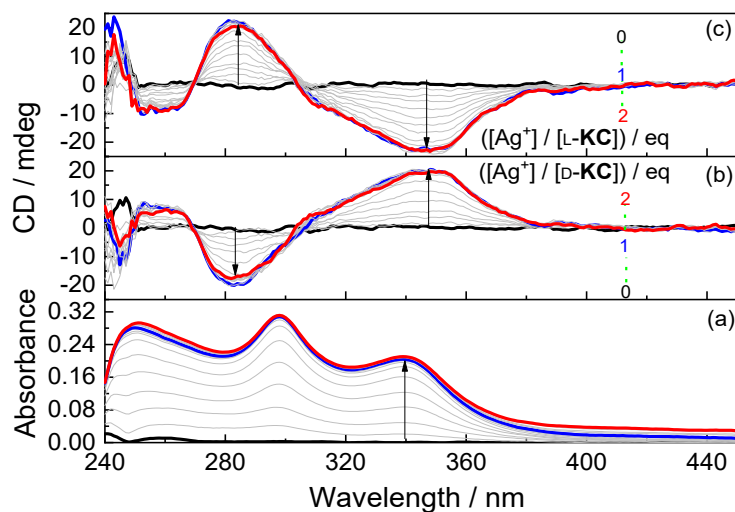

**Fig. S3** Absorption (a) spectra of L-KC and CD (b, c) spectra of L-KC and D-KC peptide in the presence Ag<sup>+</sup> in pH = 5.0 buffer. [L-KC] = [D-KC] = 50  $\mu$ M (0.0038 wt%), [Ag<sup>+</sup>] = 0 – 100  $\mu$ M.

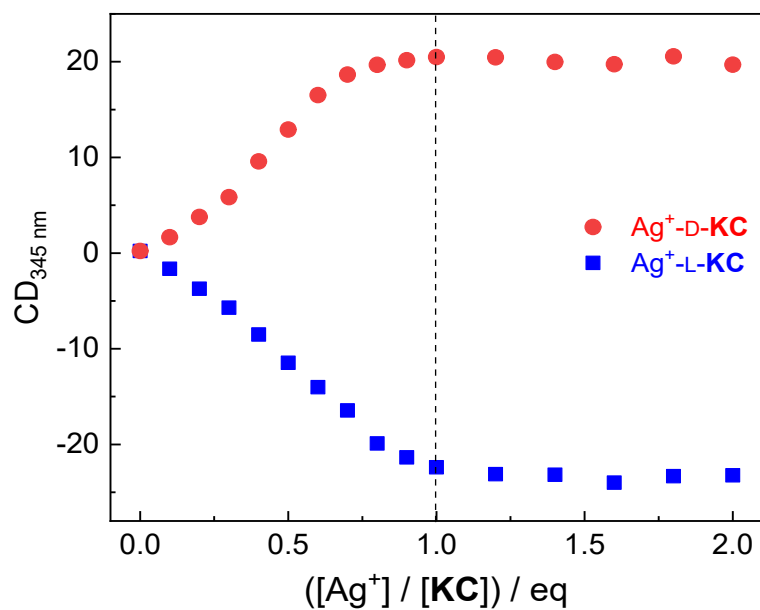

**Fig. S4** Plots of CD signal at 345 nm of L-KC or D-KC peptide versus concentration of Ag<sup>+</sup>. [L-KC] = [D-KC] = 50 μM (0.0038 wt%), [Ag<sup>+</sup>] = 0 – 100 μM.

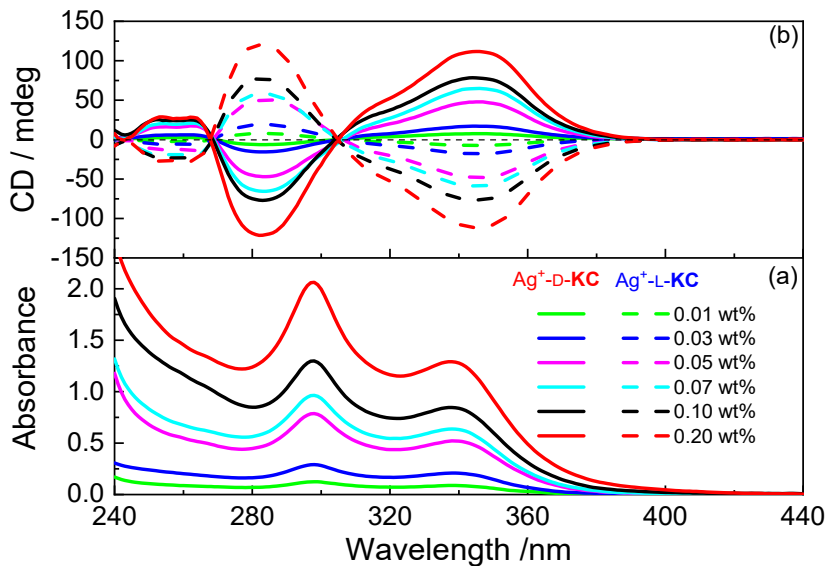

**Fig. S5** Absorption (a) and CD (b) spectra of Ag<sup>+</sup>-L-KC and Ag<sup>+</sup>-D-KC coordination polymers of increasing concentration showing hydrogelation at high concentration. Spectra were all measured using a 1-mm cuvette.

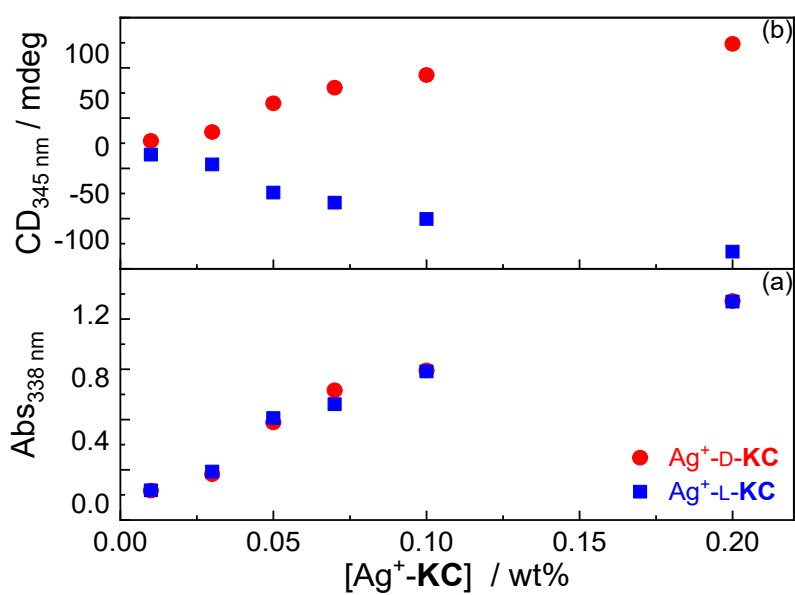

**Fig. S6** (a) Absorbance at 338 nm and (b) CD signal at 345 nm of Ag<sup>+</sup>-KC coordination polymers of increasing concentration.

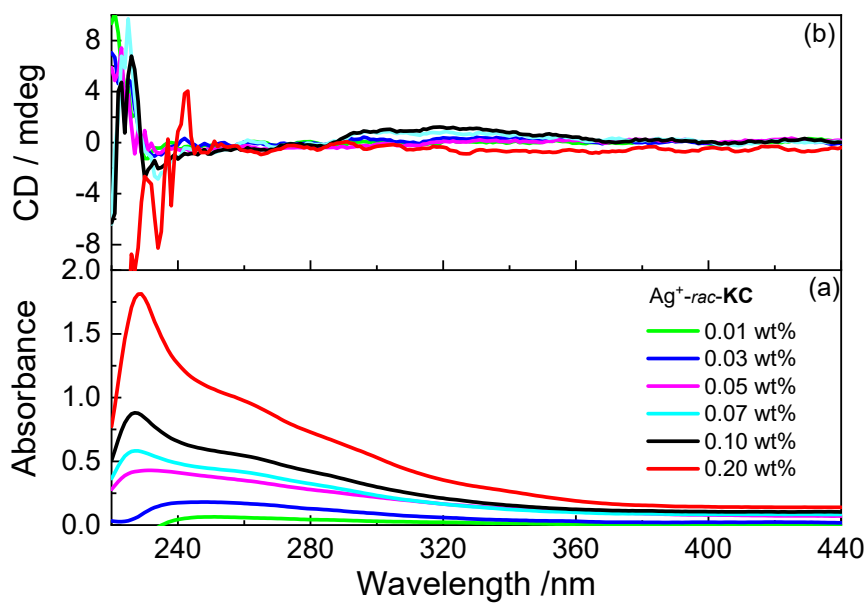

**Fig. S7** Absorption (a) and CD (b) spectra of Ag<sup>+</sup>-rac-KC coordination polymers of increasing concentration. Spectra were all measured using a 1-mm cuvette.

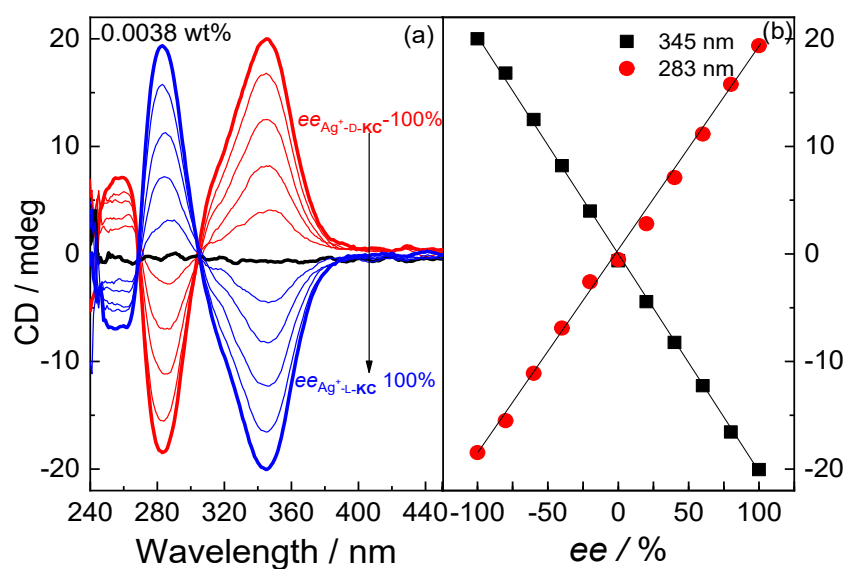

**Fig. S8** (a) CD spectra and (b) plot of CD signals of  $\text{Ag}^+$ -**KC** coordination polymers of varying *ee* of **KC** in pH = 5 buffer. Spectra were all measured in a 10-mm cuvette.  $[\text{L-KC}] + [\text{D-KC}] = [\text{Ag}^+] = 50 \mu\text{M}$  (0.0038 wt%).

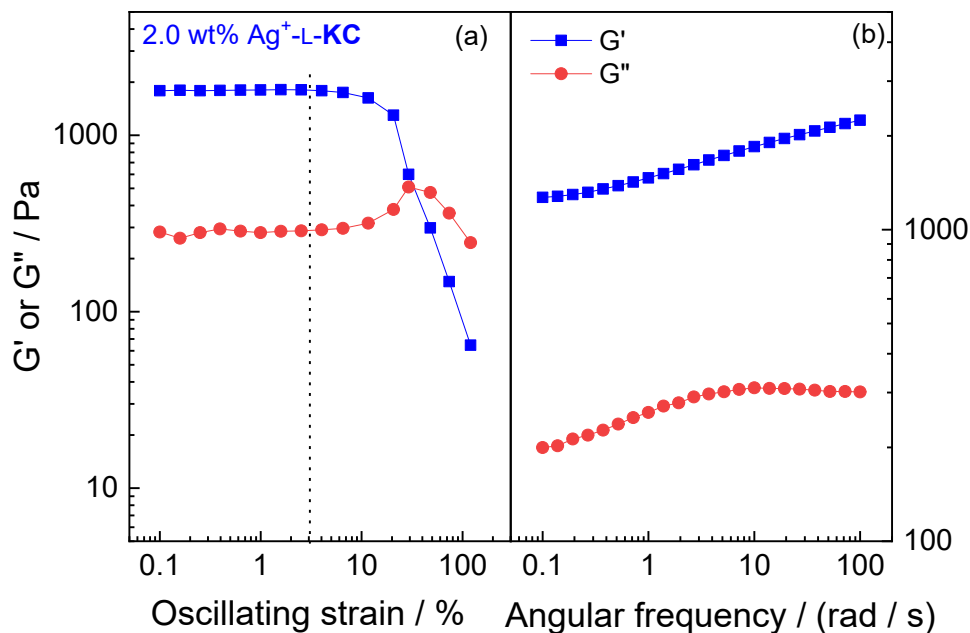

**Fig. S9** Storage modulus ( $G'$ ) and loss modulus ( $G''$ ) of 2.0 wt%  $\text{Ag}^+$ -**L-KC** hydrogel (a) at different oscillating strain and (b) at different frequencies under a strain of 3%.

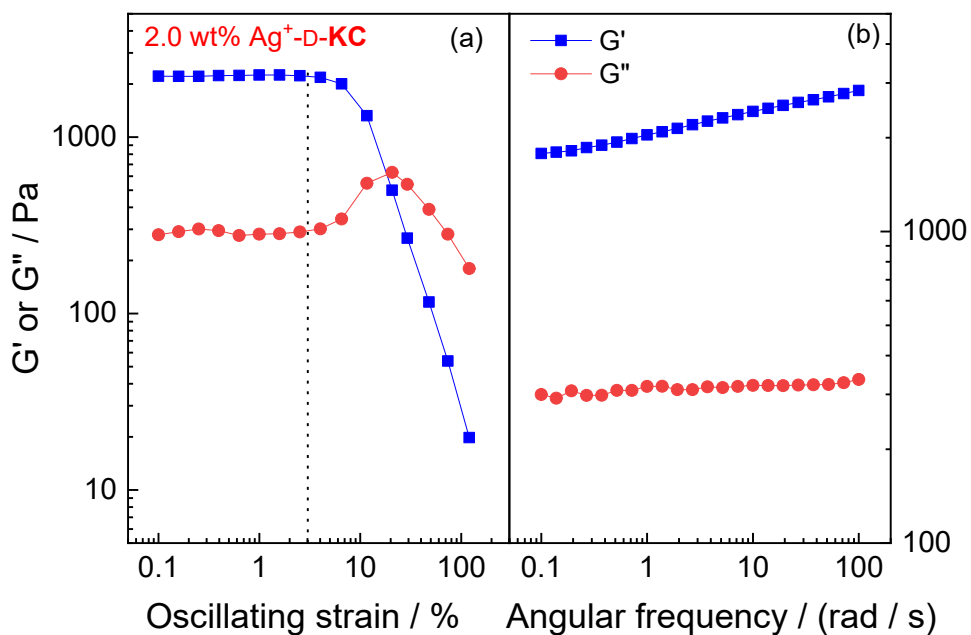

**Fig S10** Storage modulus ( $G'$ ) and loss modulus ( $G''$ ) of 2.0 wt%  $\text{Ag}^+$ -D-KC hydrogel (a) at different oscillating strain and (b) at different frequencies under a strain of 3%.

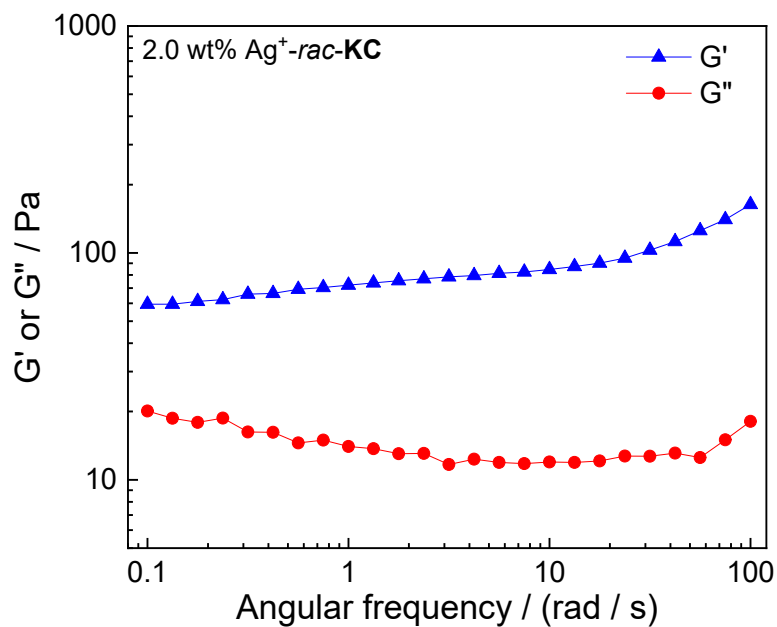

**Fig S11** Storage modulus ( $G'$ ) and loss modulus ( $G''$ ) of 2.0 wt%  $\text{Ag}^+$ -rac-KC hydrogel at different frequencies under a strain of 1%.



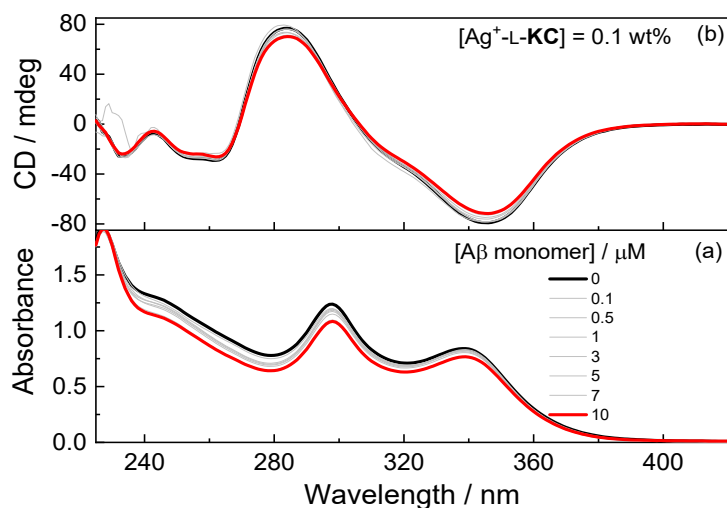

**Fig. S12** Absorption (a) and CD (b) spectra of 0.1 wt %  $\text{Ag}^+$ -L-KC hydrogel in the presence of  $\text{A}\beta(1-40)$  monomer of increasing concentration. Spectra were all measured using a 1-mm cuvette.  $[\text{A}\beta(1-40)] = 0.1 - 10 \mu\text{M}$ .

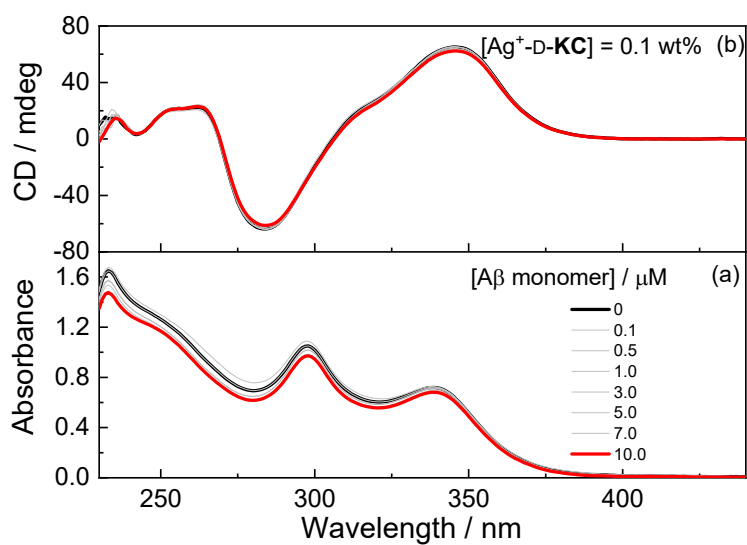

**Fig. S13** Absorption (a) and CD (b) spectra of 0.1 wt %  $\text{Ag}^+$ -D-KC hydrogels in the presence of  $\text{A}\beta(1-40)$  monomer of increasing concentration. Spectra were all measured using a 1-mm cuvette.  $[\text{A}\beta(1-40)] = 0.1 - 10 \mu\text{M}$ .

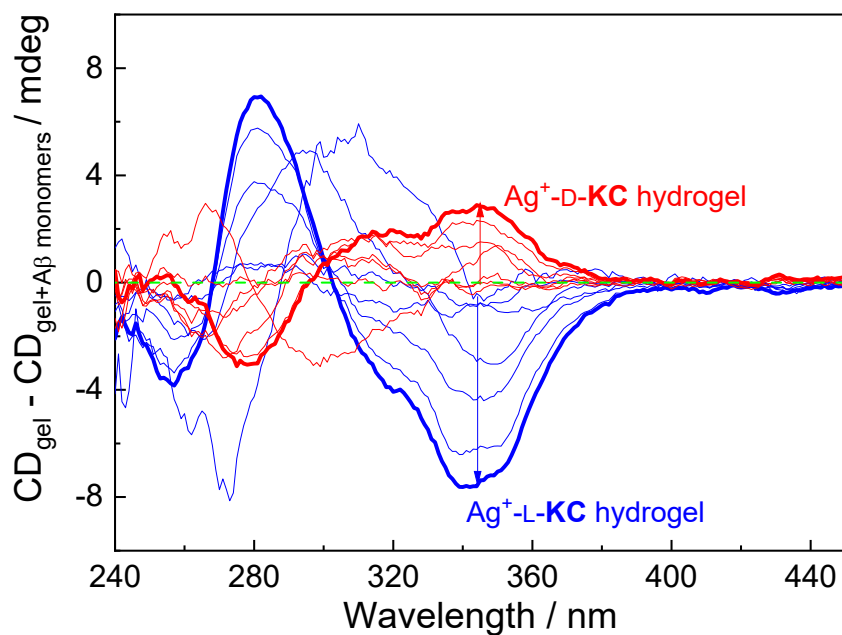

**Fig. S14** CD spectra of 0.1 wt %  $\text{Ag}^+$ -L-KC or  $\text{Ag}^+$ -D-KC hydrogel in the presence of  $\text{A}\beta(1-40)$  monomer of increasing concentration.  $[\text{A}\beta(1-40)] = 0.1 - 10 \mu\text{M}$ .

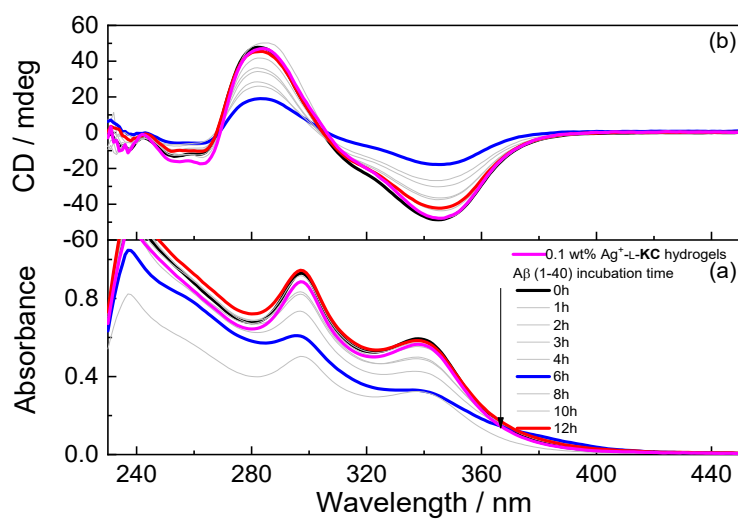

**Fig. S15** Absorption (a) and CD (b) spectra of 0.1 wt %  $\text{Ag}^+$ -L-KC hydrogel in the presence of  $1 \mu\text{M}$   $\text{A}\beta(1-40)$  after different duration of incubation. Spectra were all measured using a 1-mm cuvette.

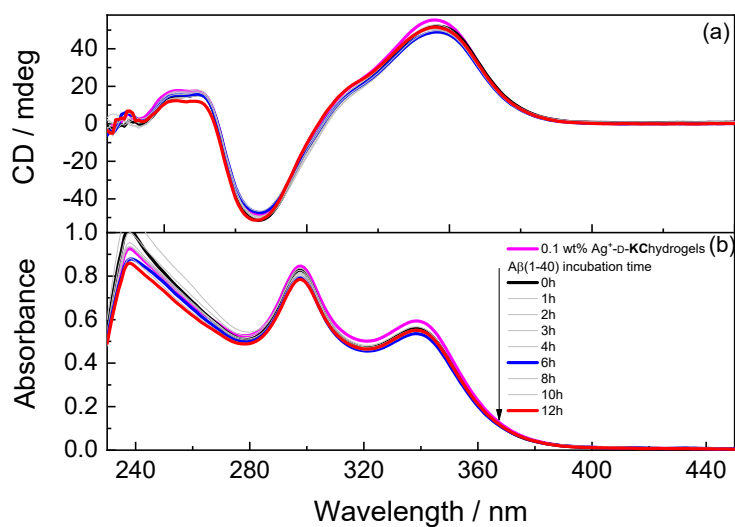

**Fig. S16** Absorption (a) and CD (b) spectra of 0.1 wt %  $\text{Ag}^+$ -D-KC hydrogel in the presence of 1  $\mu\text{M}$   $\text{A}\beta(1-40)$  after different duration of incubation. Spectra were all measured using a 1-mm cuvette.

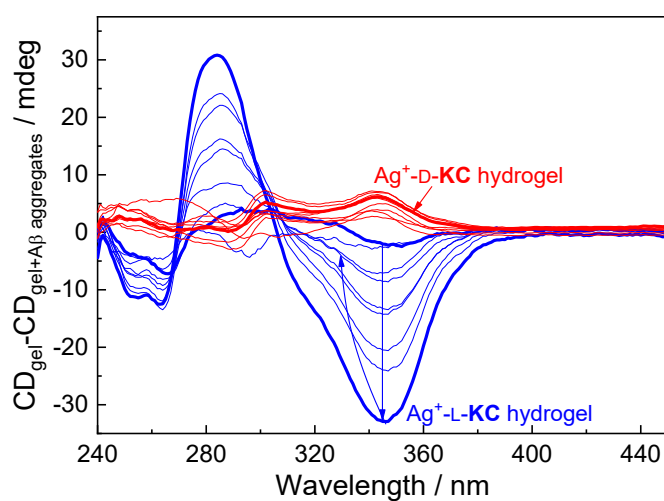

**Fig. S17** CD spectra of 0.1 wt %  $\text{Ag}^+$ -L-KC or  $\text{Ag}^+$ -D-KC hydrogel with 1  $\mu\text{M}$   $\text{A}\beta(1-40)$  aggregates after different duration of incubation ranging from 0 to 12 h.

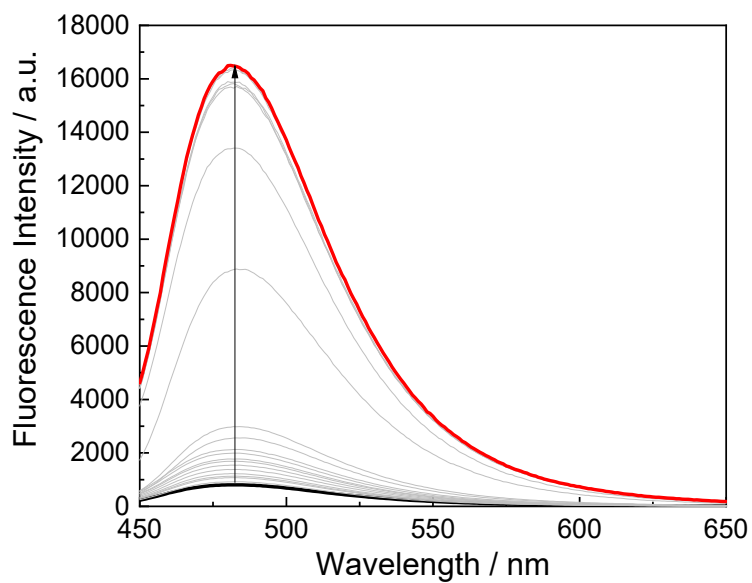

**Fig. S18** Fluorescence spectra of ThT after incubation with A $\beta$ (1-40) for different duration.  $\lambda_{\text{ex}}$  = 430 nm, excitation and emission slits were set at 5 nm and 10 nm, respectively. [ThT] = 25  $\mu\text{M}$ , [A $\beta$ (1-40)] = 50  $\mu\text{M}$ .

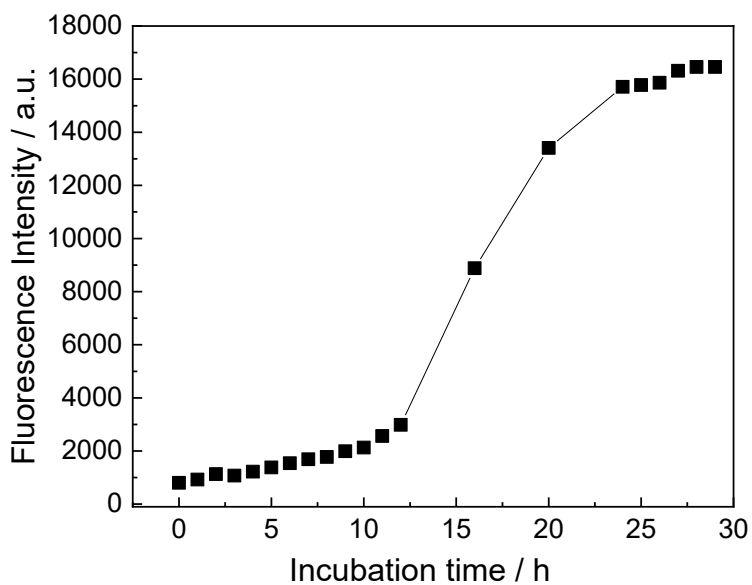

**Fig. S19** Plots of fluorescence intensity of ThT at 483 nm versus incubation time with A $\beta$ (1-40). [ThT] = 25  $\mu\text{M}$ , [A $\beta$ (1-40)] = 50  $\mu\text{M}$ .

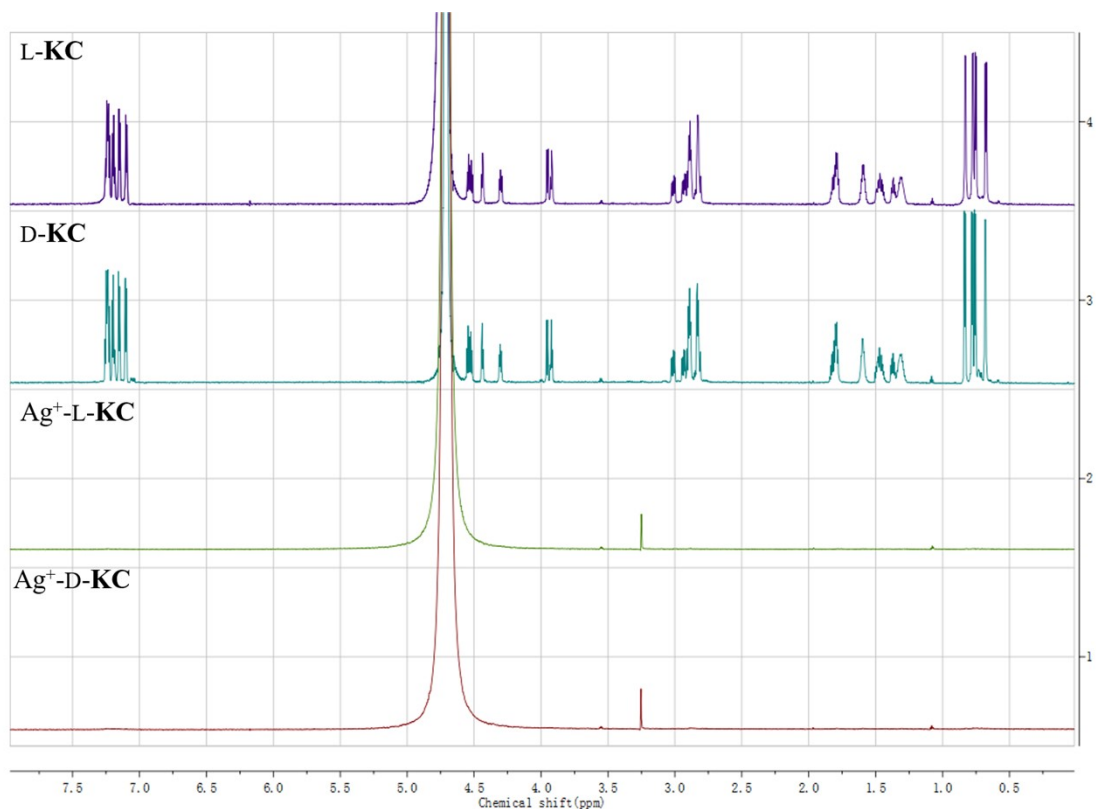

**Fig. S20** 850 MHz  $^1\text{H}$  NMR spectra of L-KC, D-KC,  $\text{Ag}^+$ -L-KC and  $\text{Ag}^+$ -D-KC in  $\text{D}_2\text{O}$ , at 0.66 mM.

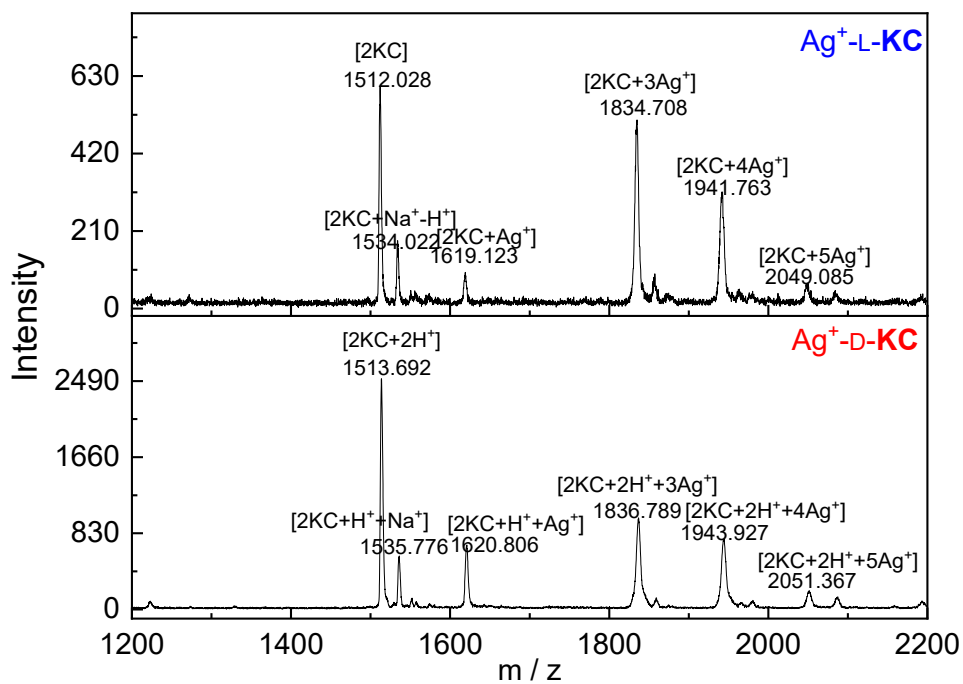

**Fig. S21** MALDI-TOF mass spectra of  $\text{Ag}^+$ -L-KC and  $\text{Ag}^+$ -D-KC hydrogels.

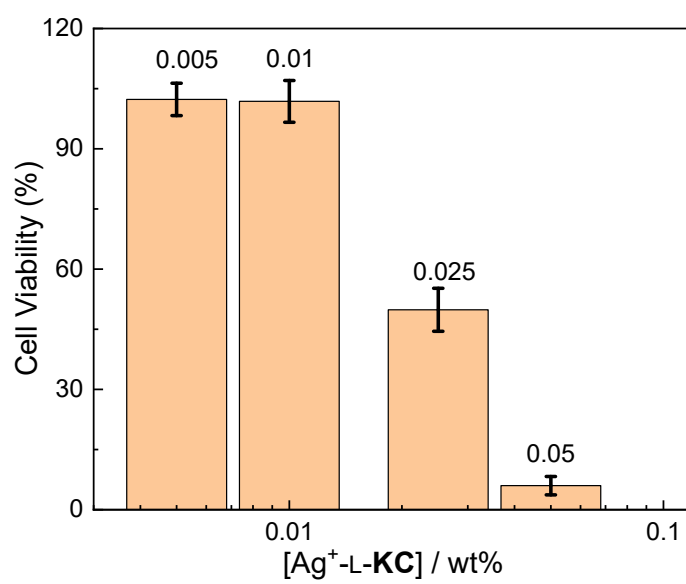

**Fig. S22** Cytotoxicity of Ag<sup>+</sup>-L-KC at concentrations of 0.005 wt%, 0.01 wt%, 0.025 wt% and 0.05 wt%, respectively.
